# Supplementary material for: Thermoelectrically polarized amorphous silica promotes sustainable carbon dioxide conversion into valuable chemical products
Source: Royal Society of Chemistry journal article supplement (doi:10.1039/d4se01389a), 2024-01-01
Supplement: d4se01389a1.pdf [file d4se01389a1.pdf]

## SUPPLEMENTARY INFORMATION

### **Thermoelectrically polarized amorphous silica promotes sustainable carbon dioxide conversion into valuable chemical products**

Marc Arnau,<sup>a,b</sup> Isabel Teixidó,<sup>a</sup> Jordi Sans,<sup>a,b,\*</sup> Pau Turon,<sup>c,\*</sup>  
and Carlos Alemán<sup>a,b,e,\*</sup>

<sup>a</sup> *IMEM-BRT Group, Departament d'Enginyeria Química, EEBE, Universitat  
Politécnica de Catalunya - BarcelonaTech, C/ Eduard Maristany, 10-14, 08019,  
Barcelona, Spain.*

<sup>b</sup> *Barcelona Research Center in Multiscale Science and Engineering, Universitat  
Politécnica de Catalunya - BarcelonaTech, 08930 Barcelona, Spain.*

<sup>c</sup> *B. Braun Surgical, S.A.U. Carretera de Terrassa 121, 08191 Rubí (Barcelona), Spain*

<sup>d</sup> *Institute for Bioengineering of Catalonia (IBEC), The Barcelona Institute of Science  
and Technology, Baldori Reixac 10-12, 08028 Barcelona, Spain.*

\* [jordi.sans.mila@upc.edu](mailto:jordi.sans.mila@upc.edu), [pau.turon@bbraun.com](mailto:pau.turon@bbraun.com) and  
[carlos.aleman@upc.edu](mailto:carlos.aleman@upc.edu)

**Table S1.** Distribution of the A-D peaks (%) derived from the deconvolution of the Si 2p peak for c-T/aSiO<sub>2</sub> and p-T/aSiO<sub>2</sub> samples.

| <b>Sample</b>            | <b>A</b> | <b>B</b> | <b>C</b> | <b>D</b> |
|--------------------------|----------|----------|----------|----------|
| c-150/aSiO <sub>2</sub>  | 15.5     | 31.1-    | 17.8     | 35.6     |
| c-500/aSiO <sub>2</sub>  | 31.8     | 63.7     | 1.5      | 3        |
| c-800/aSiO <sub>2</sub>  | 25.2     | 50.6     | 8.1      | 16.1     |
| c-1000/aSiO <sub>2</sub> | 22.2     | 44.3     | 11.2     | 22.3     |
| p-150/aSiO <sub>2</sub>  | 11.6     | 23.2     | 21.7     | 43.5     |
| p-500/aSiO <sub>2</sub>  | 10.1     | 20.3     | 23.3     | 46.3     |
| p-800/aSiO <sub>2</sub>  | 22.5     | 45.1     | 10.8     | 21.6     |
| p-1000/aSiO <sub>2</sub> | 26.5     | 53.0     | 6.8      | 13.7     |

**Table S2.** Yield of products (in  $\mu\text{mol}$  per gram of catalyst;  $\mu\text{mol/g}_c$ ) coming from the  $\text{CO}_2$  fixation reaction. The yield of each product extracted from the catalyst and the supernatant were summed. The reaction was performed using 6 bar  $\text{CO}_2$  and 40 mL of  $\text{H}_2\text{O}$  at 120 °C using c-T/aSiO<sub>2</sub> (control) and p-T/aSiO<sub>2</sub> as catalyst. Blank reactions were performed without catalyst or using untreated aSiO<sub>2</sub>.

| <b>Reaction</b>                       | <b>Formic acid</b> | <b>Methanol</b> | <b>Acetic acid</b> | <b>Ethanol</b> | <b>Isopropanol</b> | <b>Acetone</b> | <b>Dioxane</b> |
|---------------------------------------|--------------------|-----------------|--------------------|----------------|--------------------|----------------|----------------|
| Blank (without catalyst)              | -                  | -               | -                  | -              | -                  | -              | -              |
| Blank (with aSiO <sub>2</sub> )       | -                  | -               | 2.3 ± 0.2          | -              | -                  | 0.4 ± 0.2      | -              |
| c-150/aSiO <sub>2</sub> as catalyst   | 83.7 ± 23.9        | -               | 120.7 ± 21.5       | 24.4 ± 13.3    | 100.3 ± 18.7       | 10.9 ± 2.5     | 49.8 ± 14.0    |
| c-500/ aSiO <sub>2</sub> as catalyst  | -                  | -               | 29.3 ± 17.4        | 44.1 ± 15.6    | 19.2 ± 8.3         | 4.7 ± 1.3      | 6.3 ± 0.2      |
| c-800/ aSiO <sub>2</sub> as catalyst  | -                  | -               | 29.3 ± 7.5         | 25.6 ± 8.9     | -                  | -              | -              |
| c-1000/ aSiO <sub>2</sub> as catalyst | -                  | -               | 29.8 ± 2.8         | -              | -                  | -              | 18.9 ± 1.8     |
| p-150/aSiO <sub>2</sub> as catalyst   | 313.5 ± 16.9       | -               | 349.1 ± 21.8       | -              | -                  | -              | 123.7 ± 11.7   |
| p-500/aSiO <sub>2</sub> as catalyst   | 57.0 ± 15.9        | -               | 28.7 ± 10.8        | 215.2 ± 20.8   | 258.0 ± 28.4       | 11.1 ± 2.6     | 14.9 ± 2.4     |
| p-800/aSiO <sub>2</sub> as catalyst   | -                  | 23.5 ± 1.2      | 19.8 ± 9.4         | -              | -                  | 22.3 ± 10.3    | 29.7 ± 8.3     |
| p-1000/aSiO <sub>2</sub> as catalyst  | -                  | -               | 40.2 ± 13.5        | 0.2 ± 0.1      | -                  | -              | -              |

**Table S3.** Yield of products (in  $\mu\text{mol}$  per gram of catalyst;  $\mu\text{mol/g}_c$ ) coming from the  $\text{CO}_2$  fixation reaction. The yield of each product extracted from the catalyst and the supernatant were summed. The reaction was performed using 6 bar  $\text{CO}_2$  and 40 mL of  $\text{H}_2\text{O}$  at 120 °C using p-150/aSiO<sub>2</sub> control) and p-HAp as catalyst. Blank reactions were performed without catalyst or using untreated aSiO<sub>2</sub>.

| <b>Reaction</b>                     | <b>Formic acid</b> | <b>Methanol</b> | <b>Acetic acid</b> | <b>Ethanol</b> | <b>Isopropanol</b> | <b>Acetone</b> | <b>Dioxane</b> |
|-------------------------------------|--------------------|-----------------|--------------------|----------------|--------------------|----------------|----------------|
| Blank (without catalyst)            | -                  | -               | -                  | -              | -                  | -              | -              |
| Blank (with aSiO <sub>2</sub> )     | -                  | -               | 2.3 ± 0.2          | -              | -                  | 0.4 ± 0.2      | -              |
| Blank (with HAp)                    | -                  | -               | 0.2 ± 0.05         | 0.5 ± 0.1      | -                  | 0.2 ± 0.05-    | -              |
| p-150/aSiO <sub>2</sub> as catalyst | 313.5 ± 16.9       | -               | 349.1 ± 21.8       | -              | -                  | -              | 123.7 ± 11.7   |
| p-HAp as catalyst                   | 101.9 ± 14.3       | -               | 122.2 ± 12.8       | 51.8 ± 9.2     | -                  | 7.5 ± 3.6      | -              |

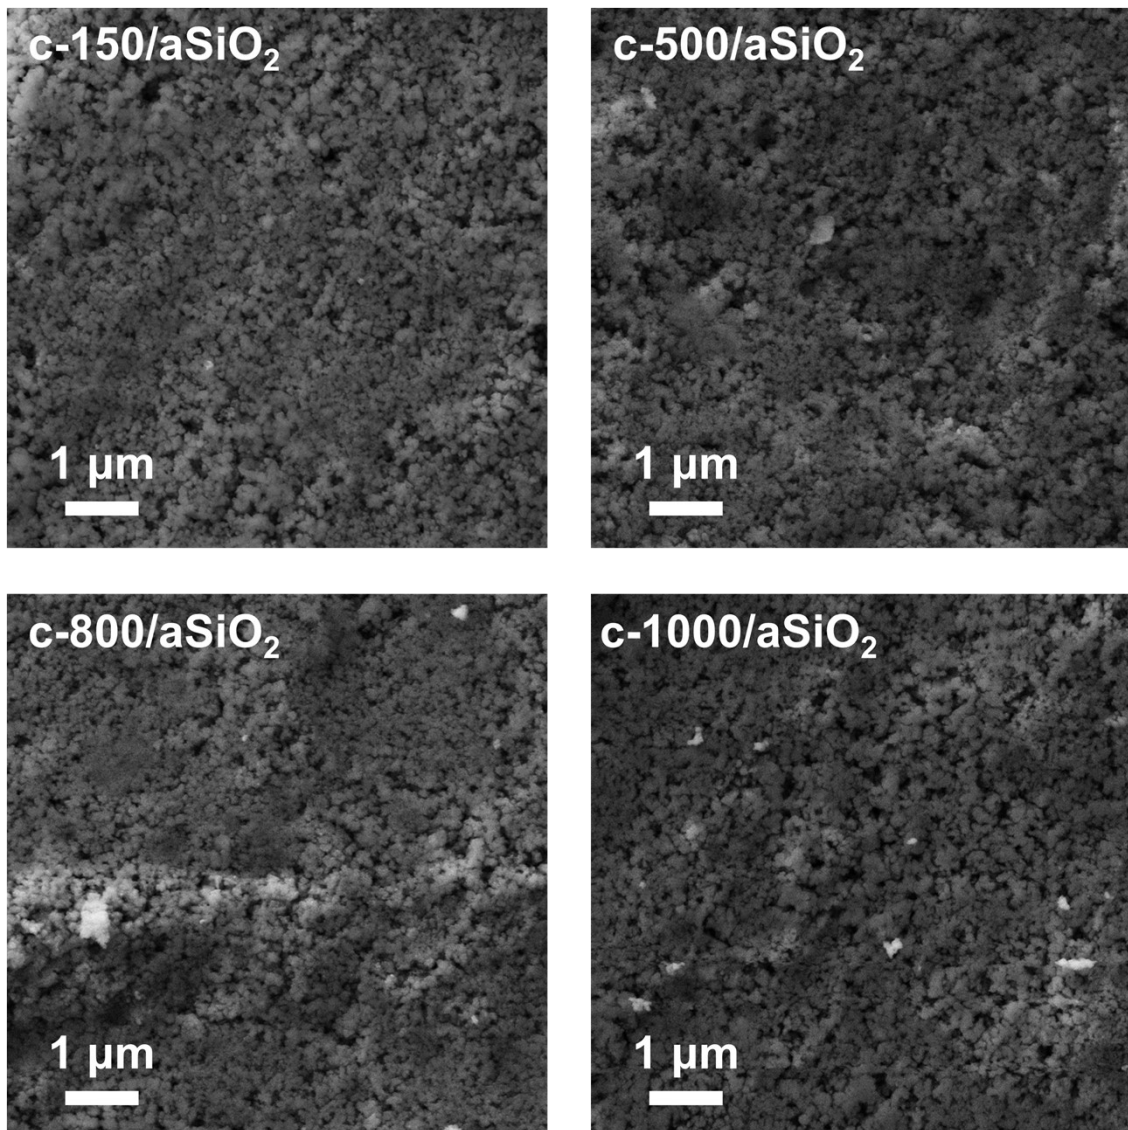

**Figure S1.** Additional SEM micrographs of c-T/aSiO<sub>2</sub>.

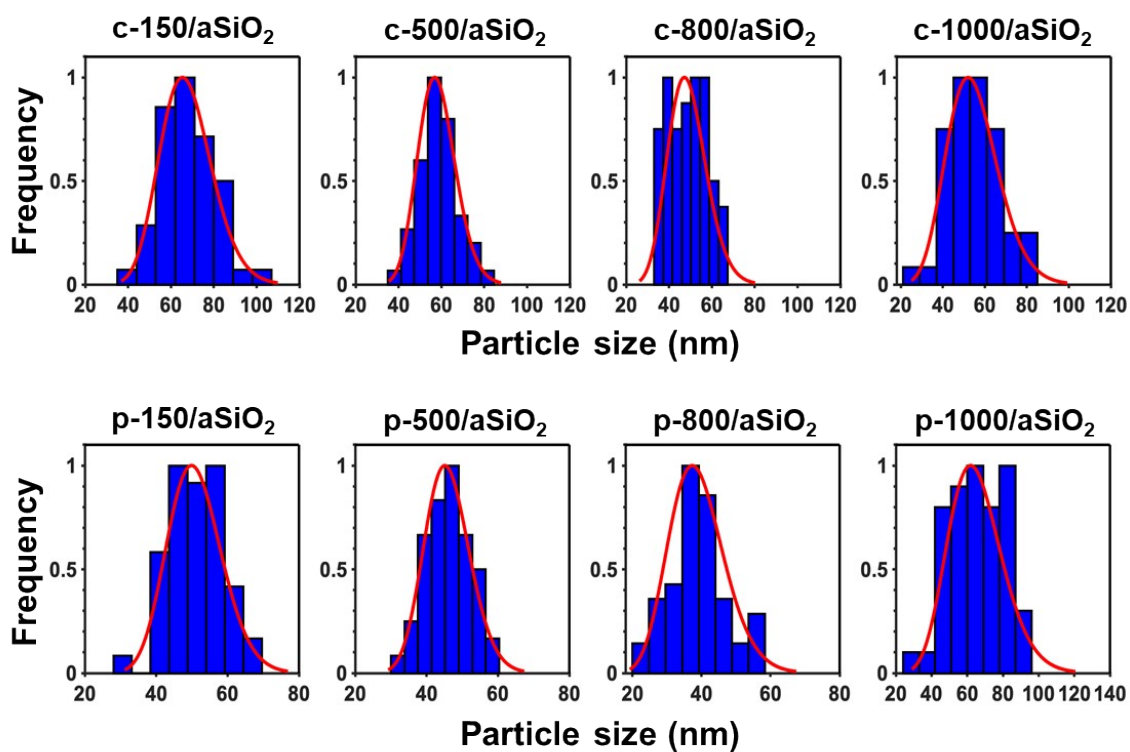

**Figure S2.** Size histograms of c-T/aSiO<sub>2</sub> and p-T/aSiO<sub>2</sub> nanoparticles derived from SEM measurements.

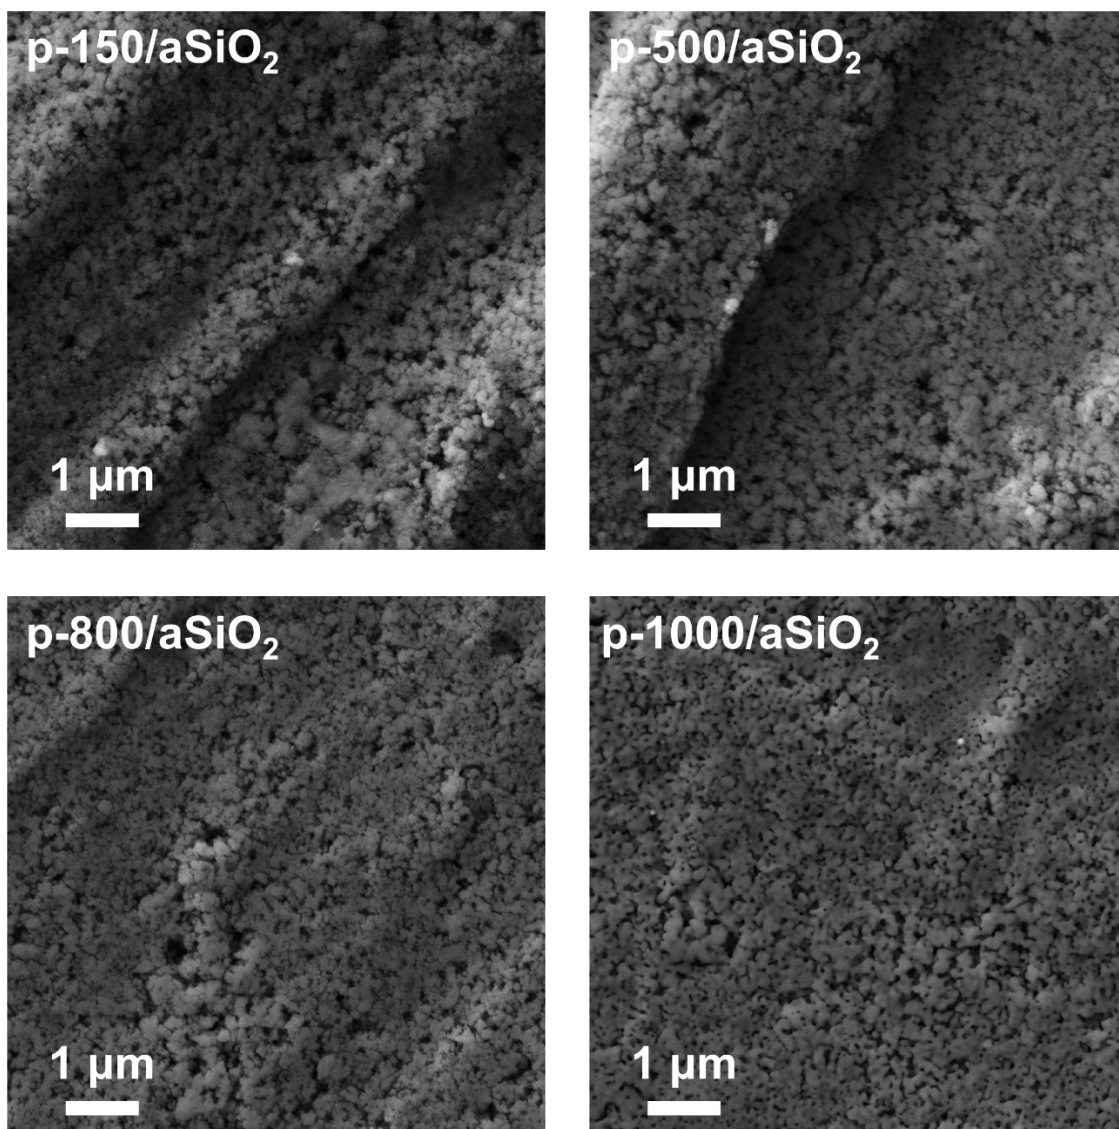

**Figure S3.** Additional SEM micrographs of p-T/aSiO<sub>2</sub>.

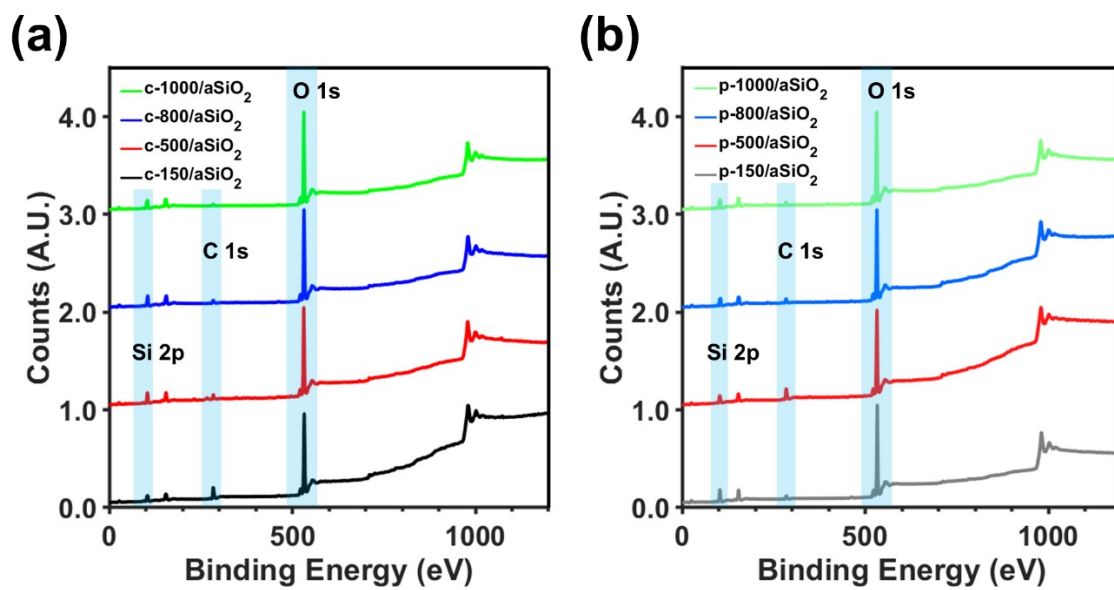

Figure S4. XPS survey scans of (a) c-T/aSiO<sub>2</sub> and (b) p-T/aSiO<sub>2</sub> samples.



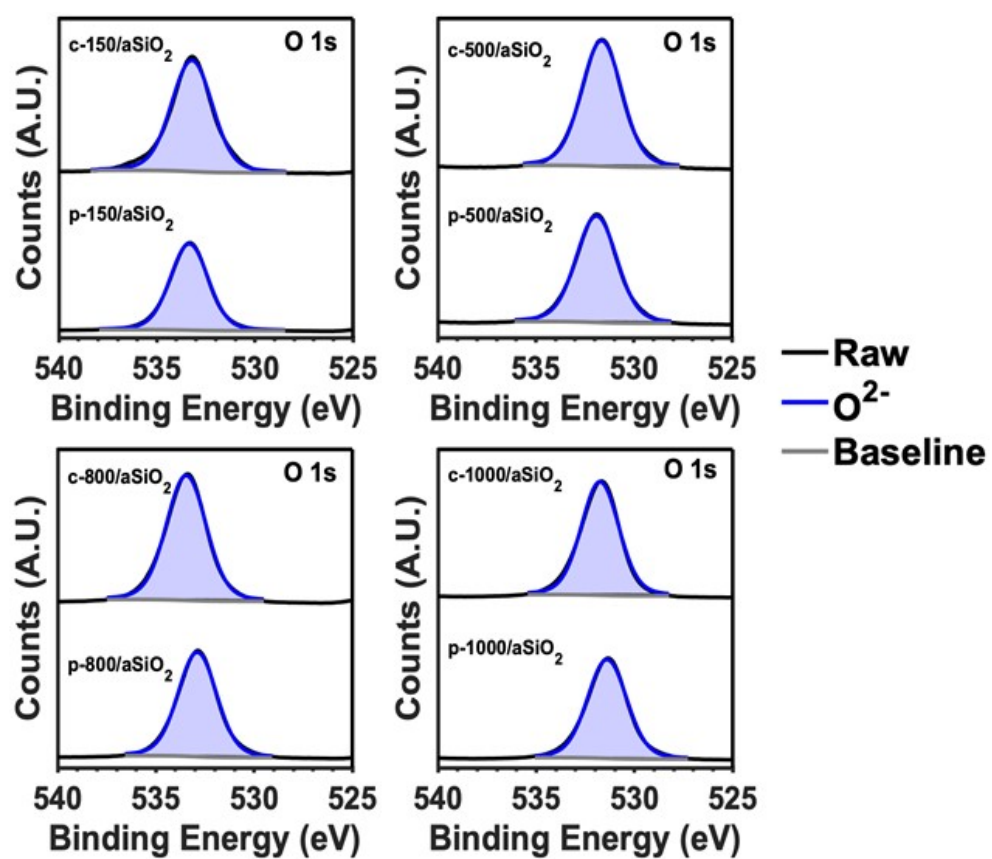

Figure S5. High resolution O 1s spectra of c-T/aSiO<sub>2</sub> and p-T/aSiO<sub>2</sub>.
